# Supplementary material
Source: PubMed Central journal article supplement (PMC4840237)
Supplement: icb2015114x1.pdf [file icb2015114x1.pdf]

## Supplementary Figure 1

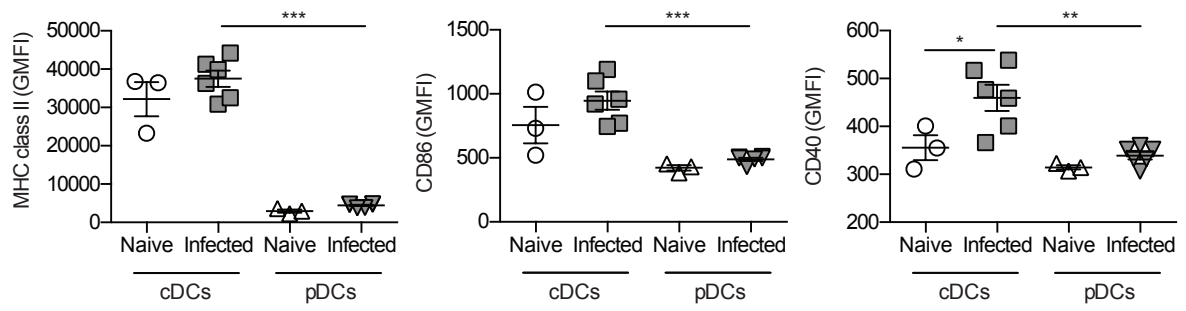

**Supplementary Figure 1. Activation phenotype of DCs isolated from the spleen during *S. mansoni* infection.** GMFI values for MHC class II, CD86 and CD40 on cDCs and pDCs enriched from the spleens of *S. mansoni*-infected mice (six weeks post-infection). Data are pooled from two experiments. Error bars represent mean  $\pm$  SEM.

## Supplementary Figure 2

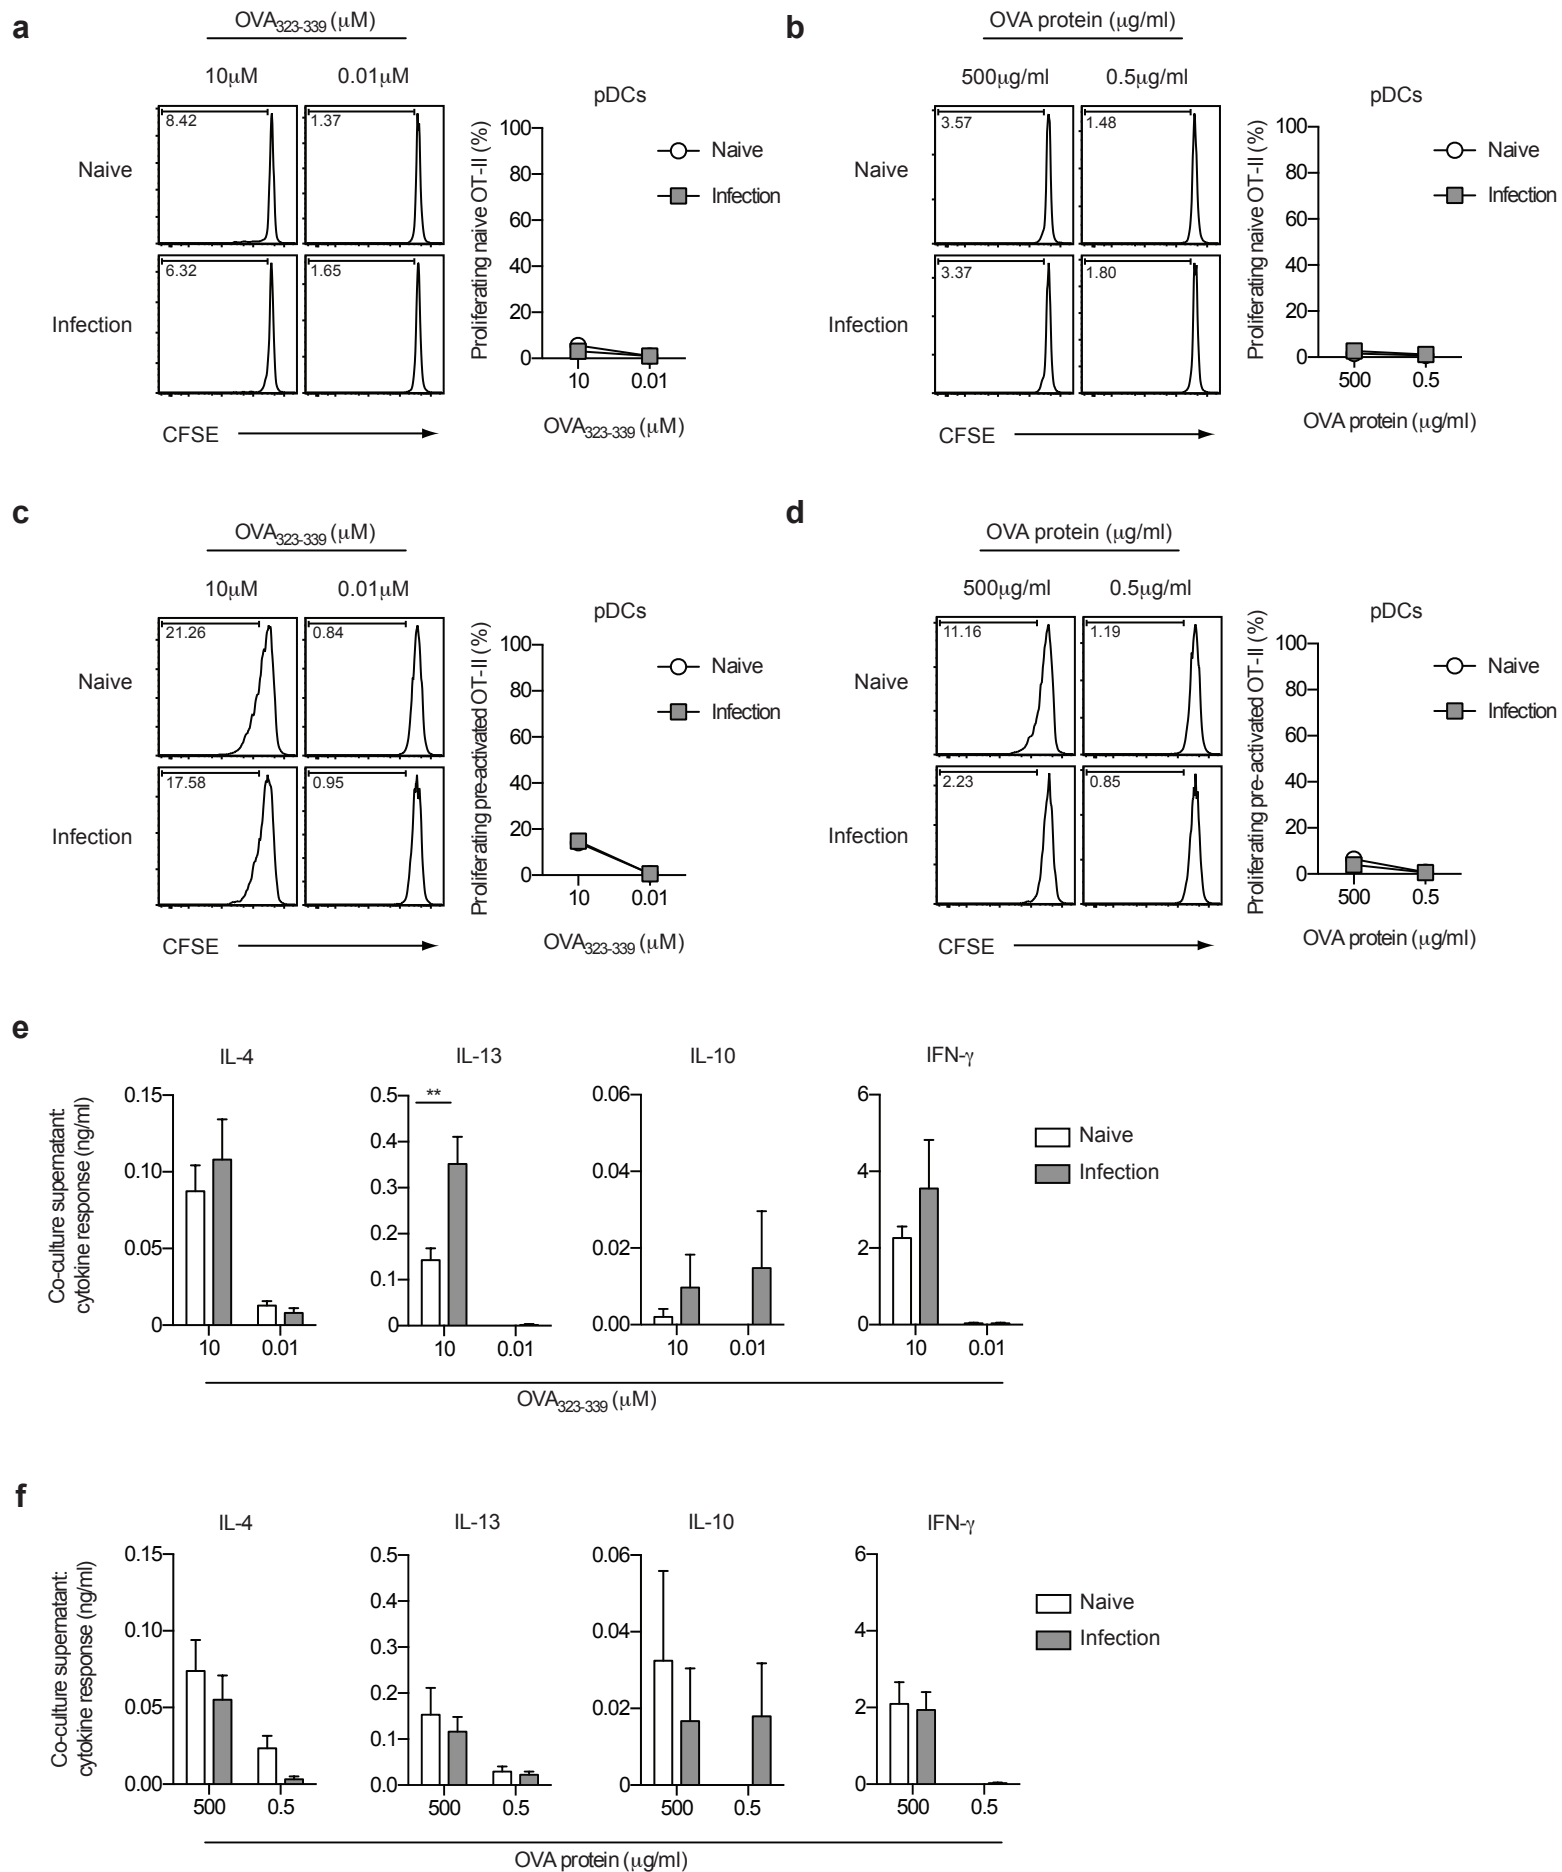

**Supplementary Figure 2. Hepatic pDCs are unable to support the expansion of naive and effector/memory CD4<sup>+</sup> T cell responses.** Proliferation of naïve OT-II CD4<sup>+</sup> T cells (A and B) or effector/memory OT-II CD4<sup>+</sup> T cells (C and D) in response to presentation of OVA<sub>323-339</sub> peptide or soluble OVA protein by pDCs isolated from the livers of naïve or infected mice (six weeks post-infection). Cytokine production in supernatants from co-cultures of pDCs and effector/memory OT-II CD4<sup>+</sup> T cells (E and F). Data are pooled from three experiments. Error bars indicate mean ± SEM.

### Supplementary Figure 3

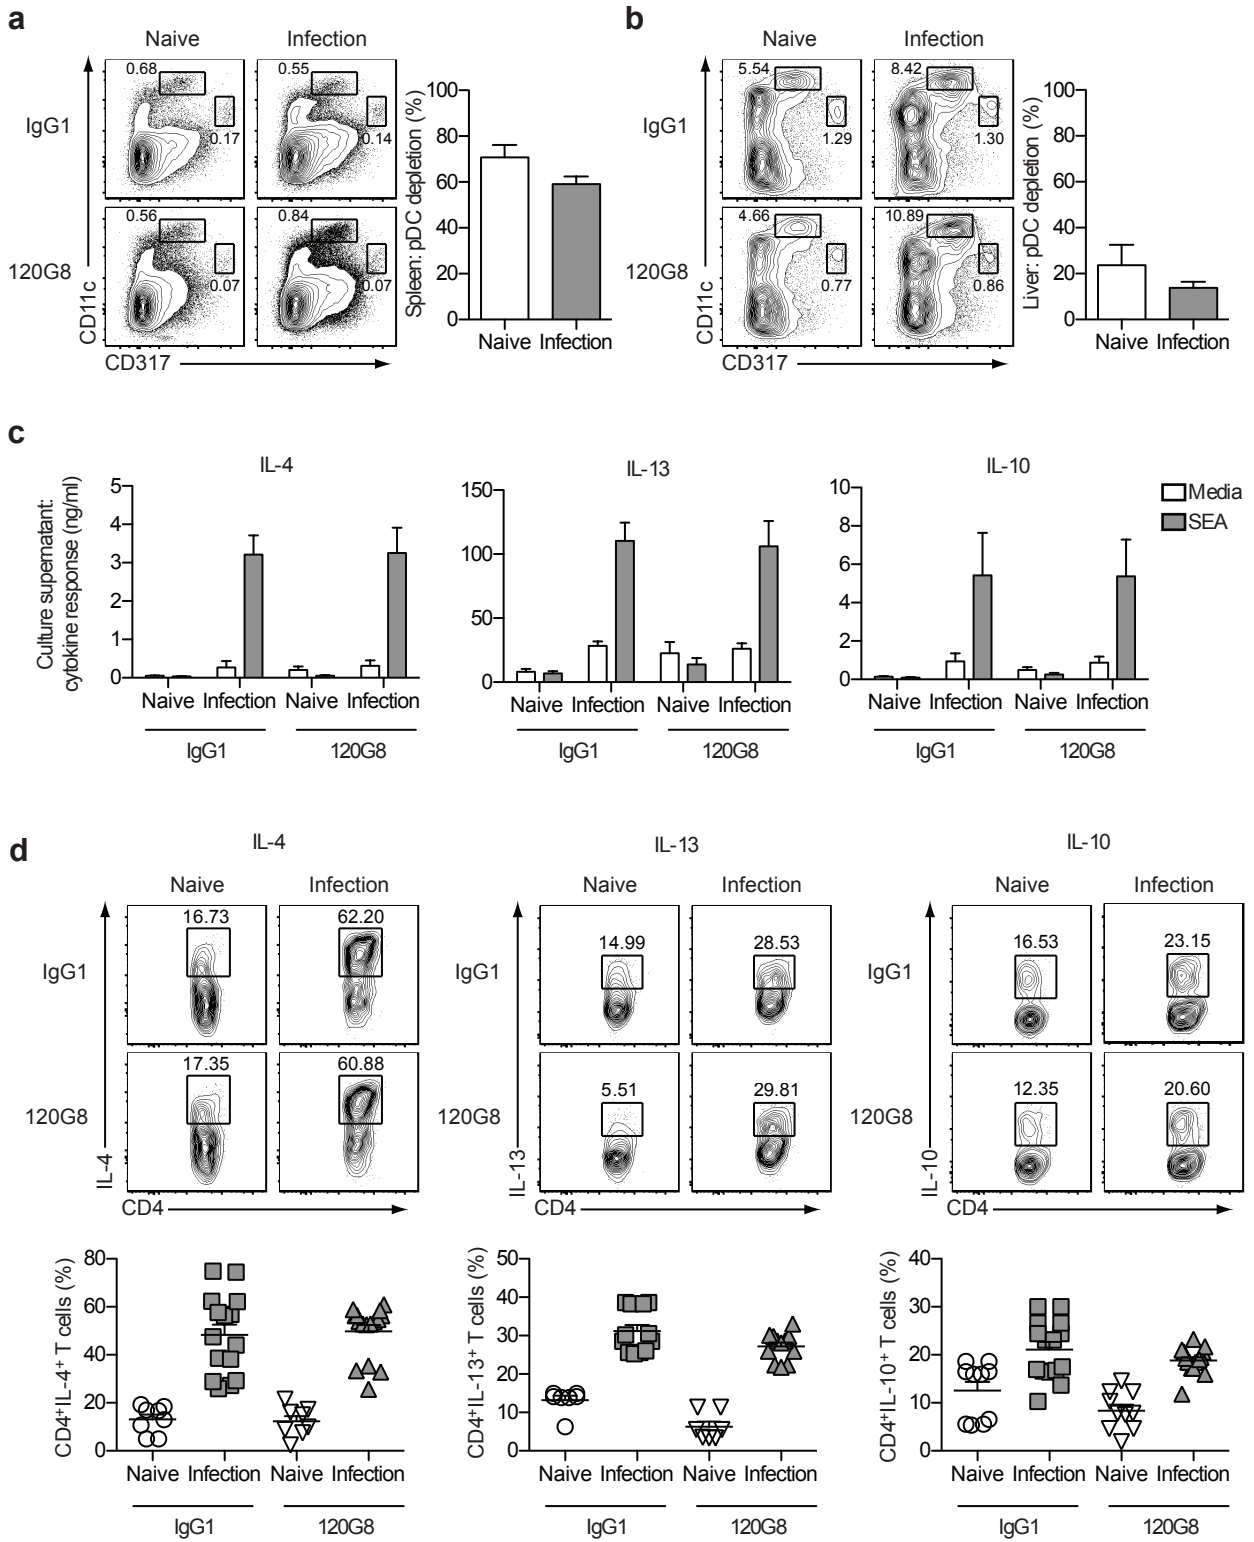

**Supplementary Figure 3. Treatment of mice with the pDC-depleting mAb 120G8 has no impact on Th2 responses in the liver.** The mAb 120G8 effectively depleted the CD11c<sup>int</sup>CD317<sup>+</sup> pDC population in the spleen (A), but was less effective at depleting pDCs in the liver (B), when administered every 48 hours from day 28 to day 42 post-infection. (C) Cells isolated from the livers of naïve or infected IgG1- or 120G8-treated mice were restimulated with medium alone or SEA and supernatants analyzed by ELISA for schistosome egg-specific recall responses. (D) Intracellular cytokine staining was used to directly assess liver CD4<sup>+</sup> T cell cytokine production. Data are pooled from two to six experiments. Error bars indicate mean  $\pm$  SEM.

# Supplementary Figure 4

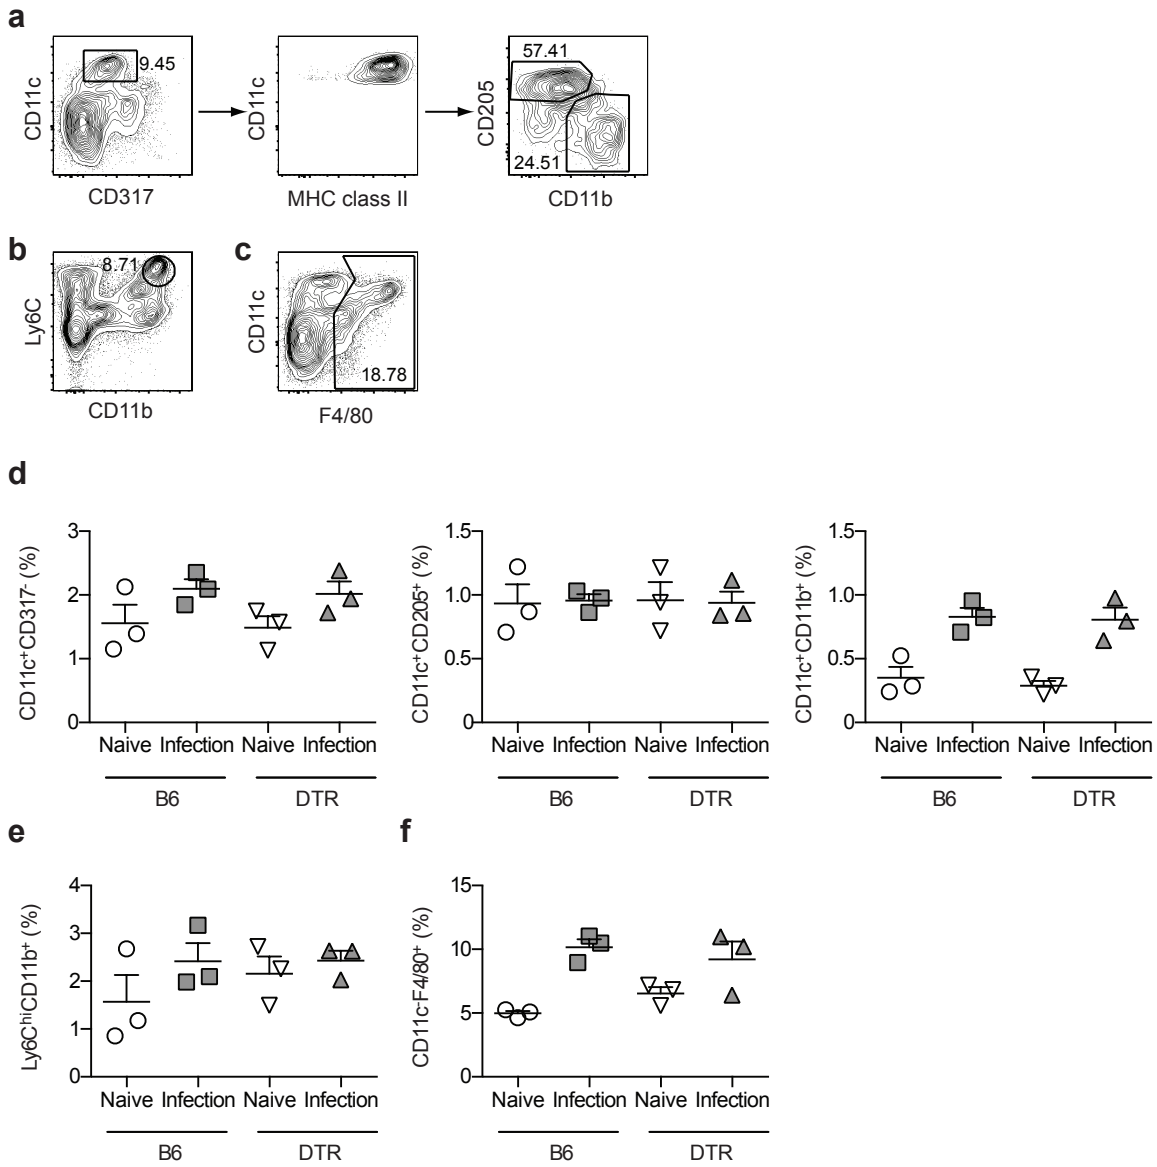

**Supplementary Figure 4. Treatment of BDCA2-DTR mice with DT has no impact on non-pDC populations.** Gating strategy to identify cDCs (a), Ly6C<sup>hi</sup> monocytes (b) and F4/80<sup>+</sup> macrophages (c) in the livers of BDCA2-DTR mice. (d-f) The percentage of each cell population in the livers of naïve or infected DT-treated B6 or BDCA2-DTR mice. Data represent one of three experiments. Error bars indicate mean  $\pm$  SEM.
